# Supplementary material for: Microglia determine an immune-challenged environment and facilitate ibuprofen action in human retinal organoids
Source: Springer Nature journal article supplement (doi:10.1186/s12974-025-03366-x), 2025-04-03
Supplement: MOESM1 [file 12974_2025_3366_MOESM1_ESM.pdf]

# Supplementary Figure 1

## a Timeline VGLUT1 expression

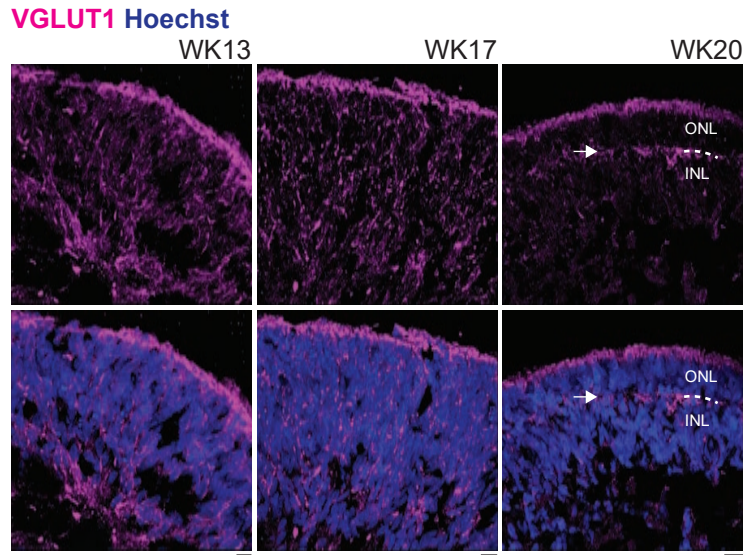

## b Timeline PSD95 expression

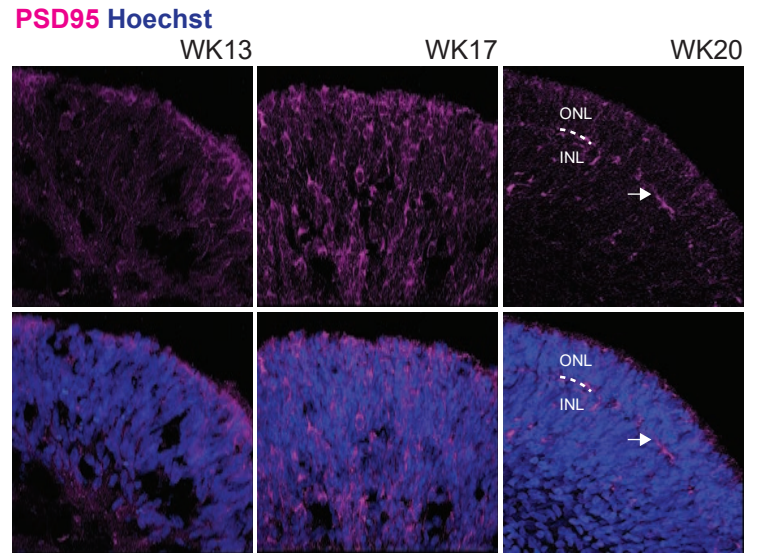

## c Immunostaining $_{3D}$ RO for retinal cell types at WK20

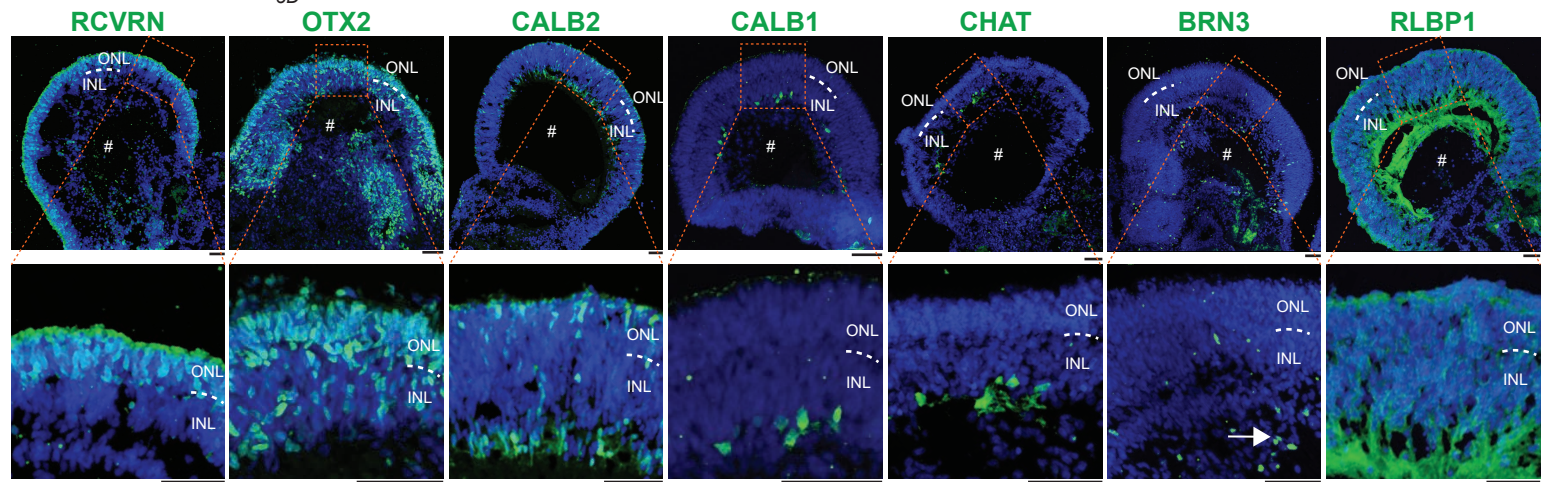

## d Expression of microglia marker in UCSC Cell Browser of Cowan et al., 2020

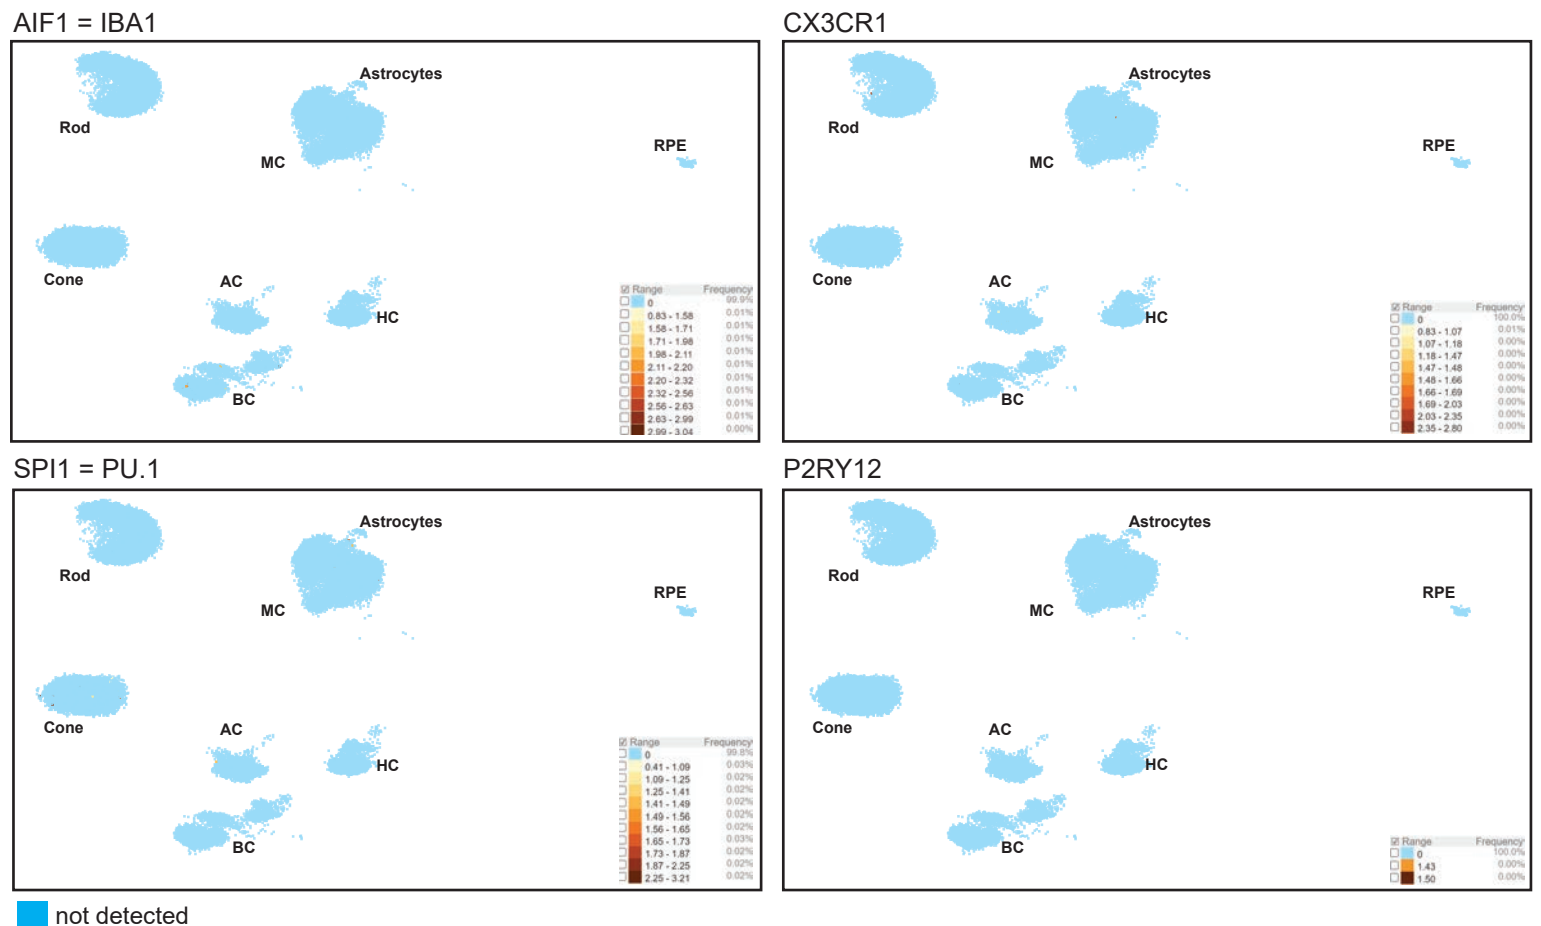

### Supplementary Figure 1 – Characterization of 3D retinal organoids.

**a-b**, Immunostaining of 3DRO cryostat sections counterstained with the nuclei-dye Hoechst (blue) and immunostained for **a**, the presynaptic marker VGLUT1 (magenta) and **b**, the postsynaptic marker PSD95 (magenta) at WK13, WK17 and WK20. White arrow: outer plexiform layer forming between the outer- and inner nuclear layer (ONL, INL, respectively). Scale bar: 10  $\mu$ m.

**c**, Representative cryostat section images of 3D-retinal organoid counterstained with the nuclei-dye Hoechst (blue) and immunostained for retinal cell type-specific markers (green) and at week 20: RCVRN (recoverin; photoreceptors). OTX2 (orthodenticle homeobox 2; photoreceptors, bipolar cells). CALB2 (calretinin; photoreceptors, bipolar-, amacrine cells). CALB1 (calbindin; amacrine-, horizontal cells). CHAT (choline acetyltransferase; amacrine cells). BRN3 (brain-specific homeobox/POU domain protein 3B; ganglion cells). RLBP1 (cellular retinaldehyde-binding protein; Müller glia). ONL: outer nuclear layer. INL: inner nuclear layer. White dashed line: outer plexiform layer. #: retinal cup lumen. White arrow: BRN3<sup>+</sup>-cells close to lumen. Scale bar: 50  $\mu$ m.

**d**, Expression of microglia transcript markers in USCS Cell Browser of Cowan *et al.*, 2020: Dataset ID: ‘Developed human retinal organoid.’ Uniform manifold approximation and projection (UMAP) of transcript expression for AIF (also known as IBA1, ionized calcium-binding adapter molecule 1), CX3CR1 (C-X3-C motif chemokine receptor 1), SPI1 (also known as PU.1, Spi-1 proto-oncogene) and P2RY12 (purinergic receptor P2Y12) of 3D-retinal organoid at week 32 and 38. AC: amacrine cell. BC: bipolar cell. Cone: cone photoreceptors. HC: horizontal cell. MC: Müller glia. RPE: retinal pigment epithelium. Rod: rod photoreceptors. Blue dot: not detected.

## Supplementary Figure 2

### a Integration into AAVS1 locus

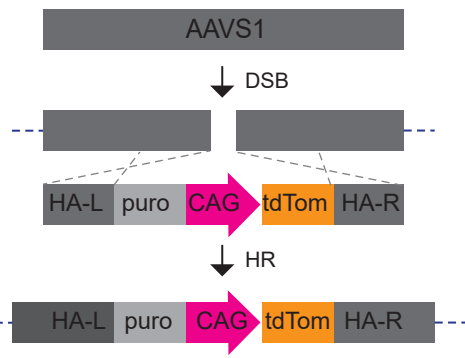

### b Validation strategy

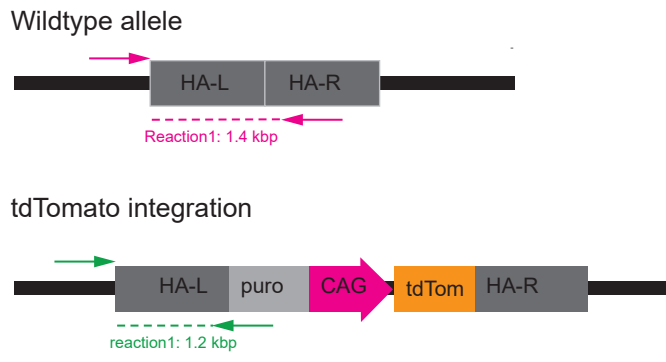

### c Validation

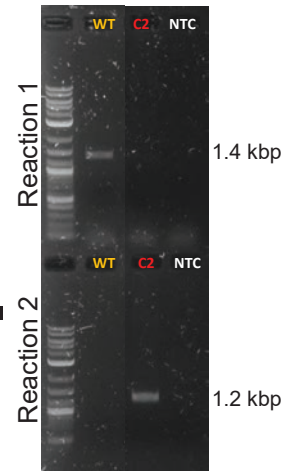

### d Pluripotency of tdTomato<sup>+</sup>-hiPSCs

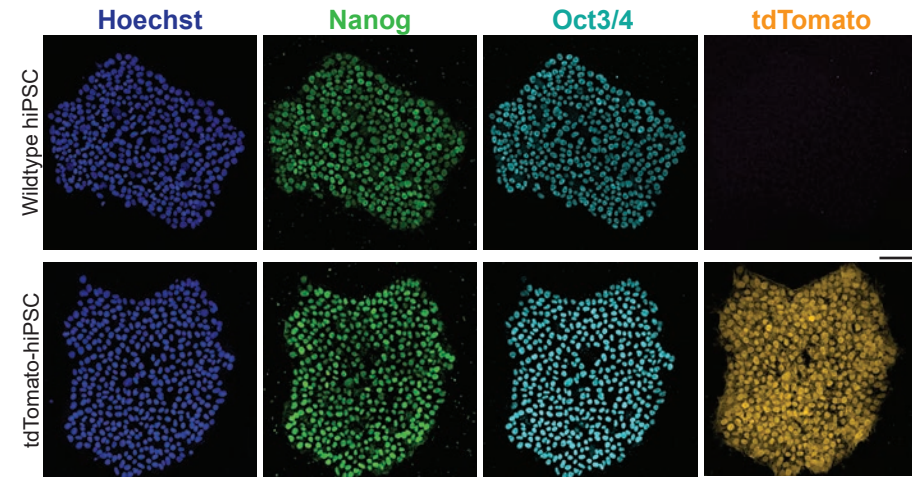

### e tdTomato expression in collected preMG

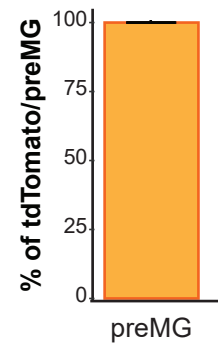

### Immunostaining of microglia precursor cells (preMG)

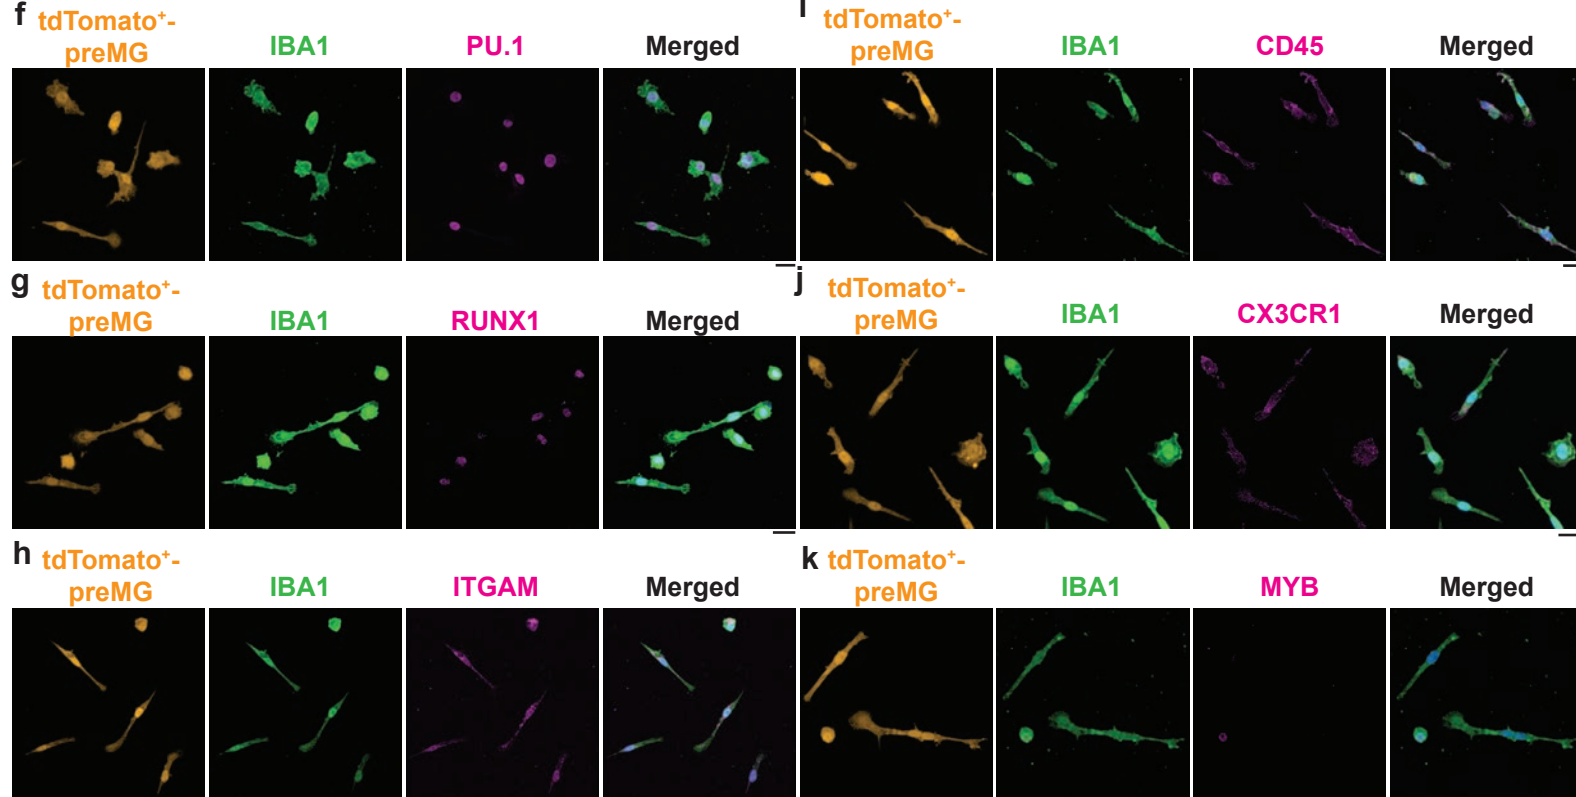

**Supplementary Figure 2 – Generation of tdTomato<sup>+</sup>-hIPSC cell line and characterization of differentiated tdTomato<sup>+</sup>-microglia precursor cells (preMG).**

**a**, Integration strategy into the adeno-associated virus integration site 1 (AAVS1) locus. DSB: double-strand break. CAG: CMV immediate enhancer/ $\beta$ -actin promoter. HA-L: homologous arm left. HA-R: homologous arm right. HR: homologous recombination. Puro: puromycin selection side. tdTom: tdTomato.

**b-c**, Validation strategy. Reaction 1: wildtype allele: PCR product 1.4 kbp. Reaction 2: tdTomato allele: PCR product 1.2 kbp. PCR: polymerase chain reaction.

**c**, PCR product size. Top: Reaction 1 - wildtype AAVS1 locus (1.4 kbp). Bottom: Reaction 2 - construct integrated into AAVS1 (1.2 kbp). Orange: wildtype clone. Red: clone with homozygous integration of the construct. NTC: non-template control. Kbp: kilobase pair.

**d**, Validating pluripotency for the wildtype human induced pluripotent stem cell (hIPSC) line SC102A (top) and the tdTomato<sup>+</sup>-hIPSC line SC102A (bottom). Immunostaining of hIPSC colonies for NANOG (nanog homeobox, green), OCT3/4 (octamer-binding protein 3, cyan), and counterstaining for the nuclei-dye Hoechst (blue). Intrinsic tdTomato expression (orange). Scale bar: 100  $\mu$ m.

**e**, Bar chart of tdTomato<sup>+</sup>/IBA1<sup>+</sup>-preMG with standard error of the mean.

**f-k**, Representative images of tdTomato-expressing microglia precursor cells (preMG, orange) harvested from the supernatant and plated on a new dish. Cells counterstained for the nuclei-dye Hoechst (blue, merged image), immunostained for IBA1 (ionized calcium-binding adapter molecule 1, green) and the microglia/macrophage markers in magenta for **f**, PU.1 (hematopoietic transcription factor PU.1); **g**, RUNX1 (runt-related transcription factor 1); **h**, ITGAM (integrin subunit alpha m); **i**, CD45 (cluster of differentiation 45/ protein tyrosine phosphatase receptor); **j**, CX3CR1 (chemokine (C-X3-C) receptor 1); **k**, MYB (MYB proto-oncogene). Scale bar: 20  $\mu$ m.



# Supplementary Figure 3

## a *preMG attach to surface of* <sub>3D</sub>*RO*

**tdTomato<sup>+</sup>-preMG**

**Brightfield**

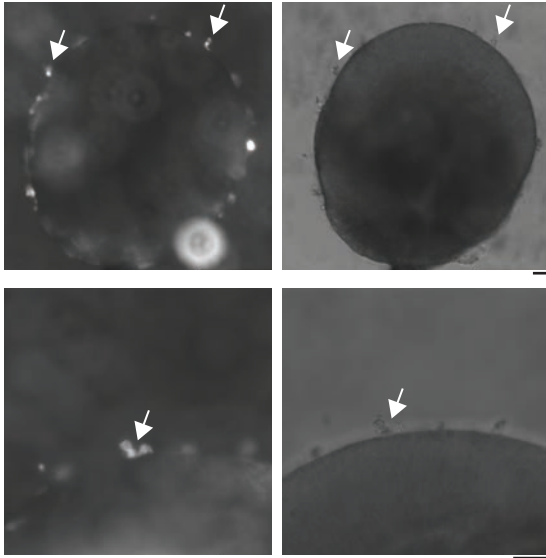

## b *iMG migrate into deeper layers*

**tdTomato<sup>+</sup>-iMG**

**Brightfield**

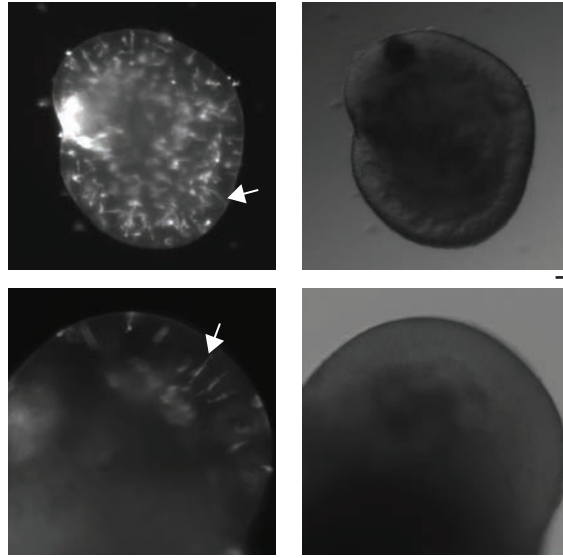

## c *iMG colonize OPL*

**tdTomato<sup>+</sup>-iMG** **Hoechst**

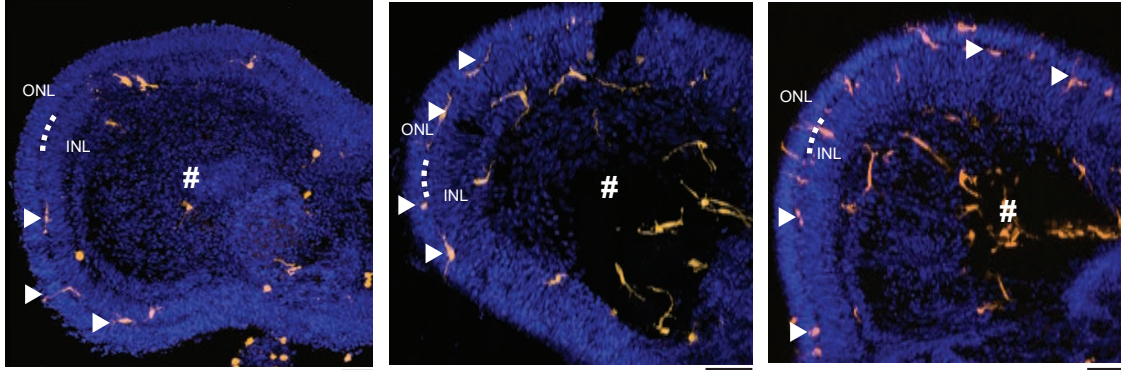

**Supplementary Figure 3 – tdTomato<sup>+</sup>-microglia precursor cells (preMG) integration patterns into 3D retinal organoids.**

Representative images of 3D-retinal organoids. Left: fluorescence image, right: brightfield image. 4x magnification (top) and 10x magnification (bottom). Scale bar: 20 $\mu$ m. **a**, tdTomato<sup>+</sup>-microglia precursor cells (preMG, white arrow) attach on week 17 at the surface of 3D-retinal organoids (3DRO). **b**, tdTomato<sup>+</sup>-microglia-like cells (iMG) integrate into the 3D-retinal organoids at week 20, showing a bipolar shape (white arrow).

**c**, Images of iMG-3DRO cryostat sections with tdTomato<sup>+</sup>-iMG (orange) counterstained with the nuclei-dye Hoechst (blue) and at WK20. White arrowhead: iMG located in the outer plexiform layer forming between the outer- and inner nuclear layers (ONL, INL, respectively). #: lumen. Scale bar: 50  $\mu$ m.

## Supplementary Figure 4

### a Influence of BDNF

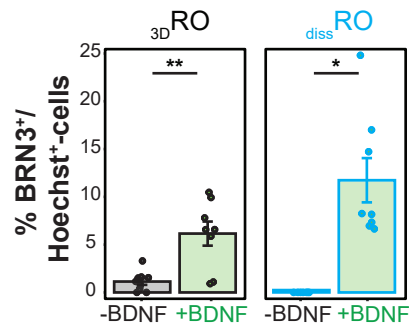

### b iMG distribute within iMG<sub>diss</sub> RO

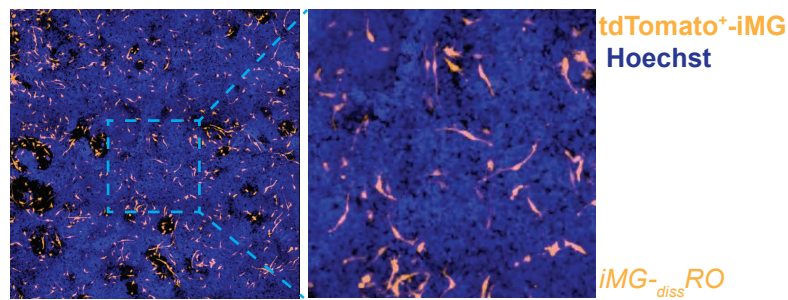

### c Schematic timeline of tested microglia markers

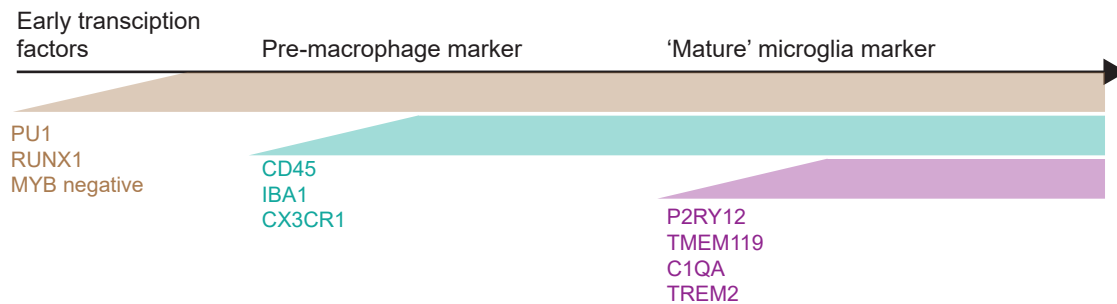

### d mRNA expression microglia marker

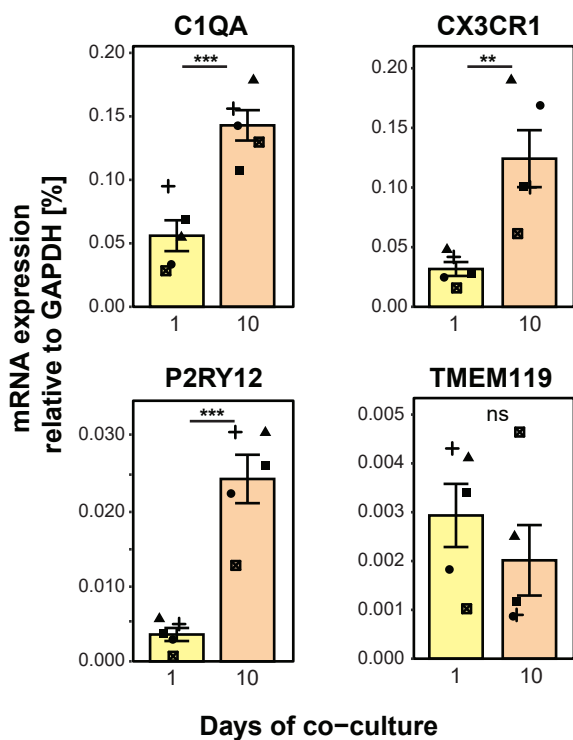

### e Early transcription factors

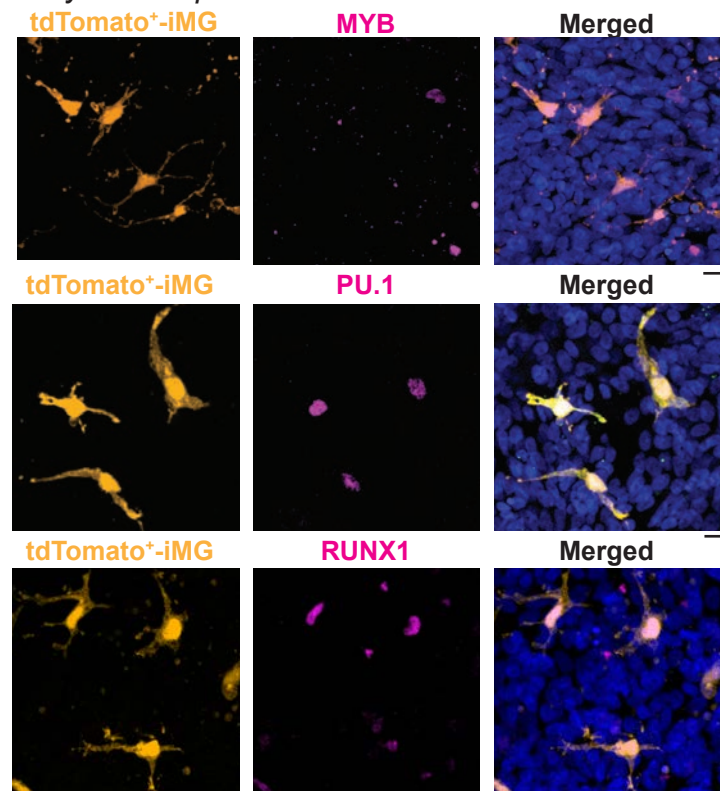

### f Pre-macrophage marker

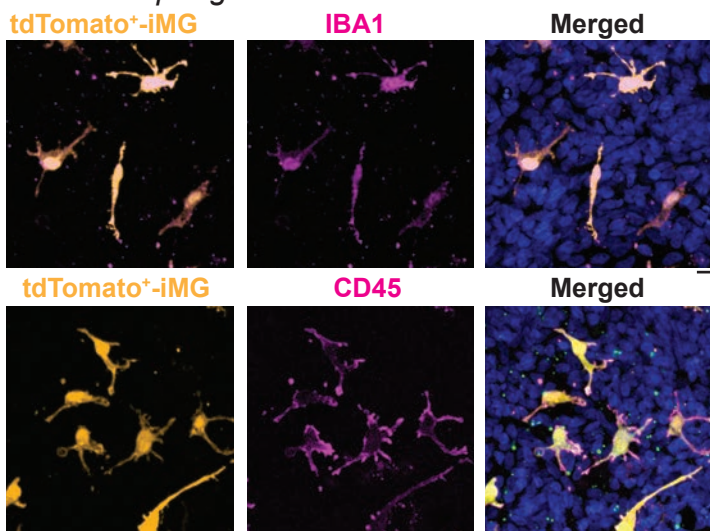

### g 'Mature' microglia marker

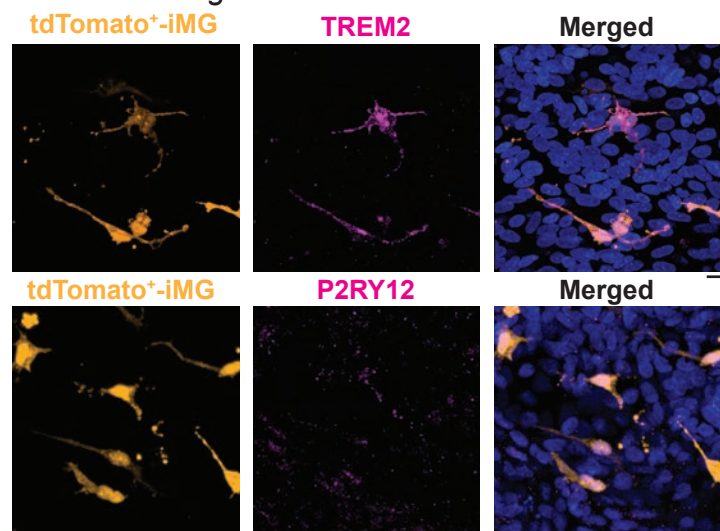

#### **Supplementary Figure 4 – Validating iMG signature.**

**a**, Impact of brain-derived neurotrophic factor (BDNF) on ganglion cell survival. Bar chart of percentage of BRN3<sup>+</sup>-cells relative to Hoechst<sup>+</sup>-cells with standard error of the mean in 3D-retinal organoids (3DRO, left) and dissociated retinal organoid culture (dissRO, right) cultured either in standard retinal organoid differentiation media without (-BDNF, grey) or supplemented with BDNF (+BDNF, green) from week 15 to 20. 3DRO: Each dot is one cryostat section of independent retinal cups. Welch's t-test. dissRO: Each dot is one region of interest. One-sample Wilcoxon signed rank test.

**b**, Image of iMG distribution within iMG-dissRO (orange) at WK20, counterstained with the nuclei-dye Hoechst (blue). Scale bar: 100  $\mu$ m.

**c**, Schematic timeline of microglia marker expression during development.

**d**, RT-qPCR for the microglia marker C1QA (complement component C1q), CX3CR1 (C-X3-C motif chemokine receptor 1), P2RY12 (purinergic receptor P2Y G-protein-coupled 12) and TMEM119 (transmembrane protein 119) in iMG-dissRO after 1 and 10 days of coculture. Bar chart with SEM of mean mRNA transcript expression relative to GAPDH. Each dot is one biological replicate. Student's t-test.

**e-g**, Representative images of iMG-dissRO with tdTomato<sup>+</sup>-iMG (orange), counterstained for the nuclei-dye Hoechst (blue) and immunostained in magenta for **e**, early transcription factors PU.1 (hematopoietic transcription factor PU.1), RUNX1 (runt-related transcription factor 1) and MYB (MYB Proto-Oncogene); **f**, 'early' microglia marker IBA1 (ionized calcium-binding adapter molecule 1) and CD45 (cluster of differentiation 45/ protein tyrosine phosphatase receptor); and **g**, 'mature' microglia marker P2Y12 and TREM2 (Triggering Receptor Expressed On Myeloid Cells 2). Scale bar: 10  $\mu$ m.

For detailed statistical analysis, see **Supplementary Table 4**.

\*\*\*p < 0.001. \*\*p < 0.01. \*p < 0.05. <sup>ns</sup>p > 0.05, not significant.



# Supplementary Figure 5

## a Quantification CCAS3<sup>+</sup>-fragments

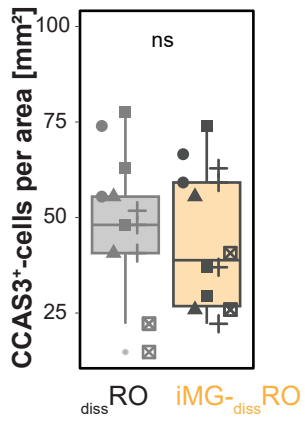

## b Quantification Hoechst<sup>+</sup>-cells

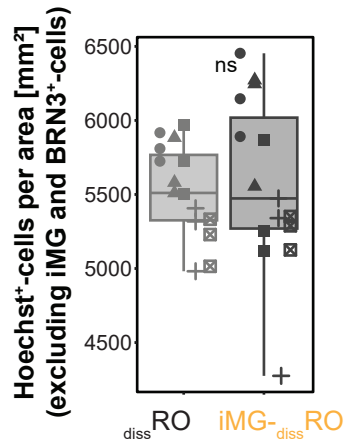

## c Quantification OTX2<sup>+</sup>-cells

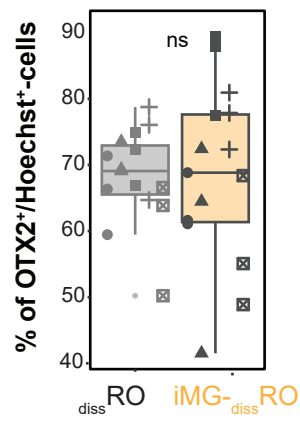

## d iMG phagocytose apoptotic fragments

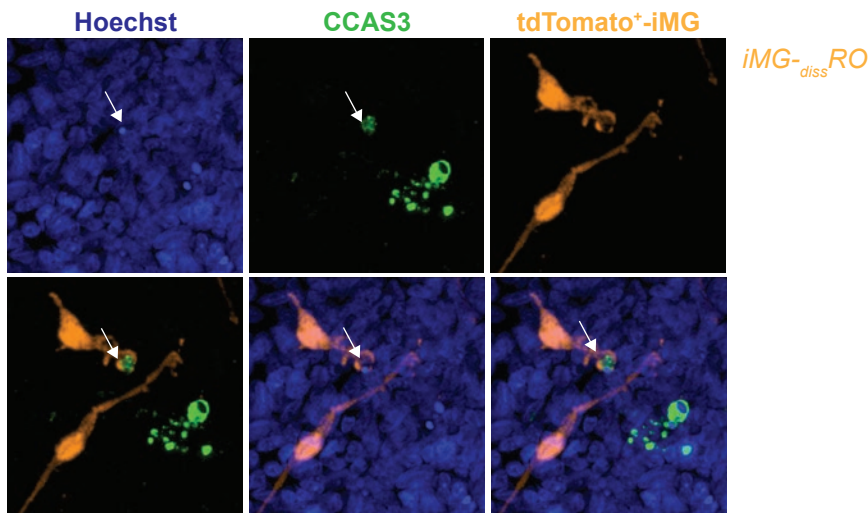

## e iMG remove Hoechst<sup>+</sup>-fragments in culture

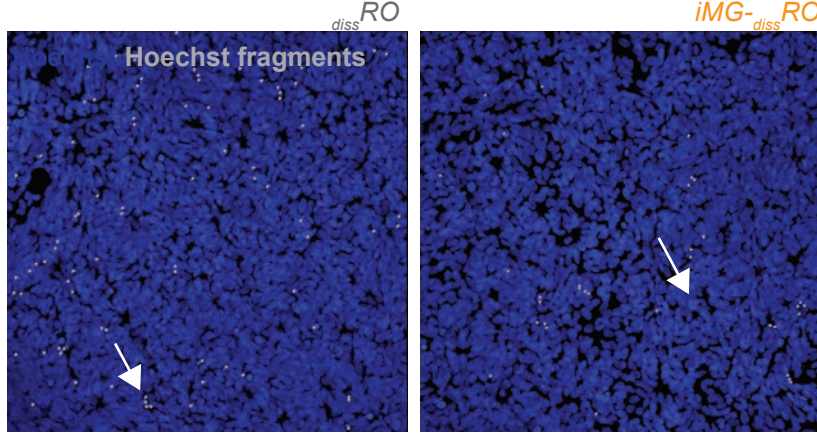

## f Quantification Hoechst<sup>+</sup>-fragments

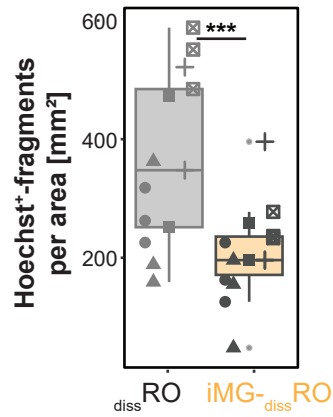

## g iMG phagocytose Hoechst<sup>+</sup>-fragment

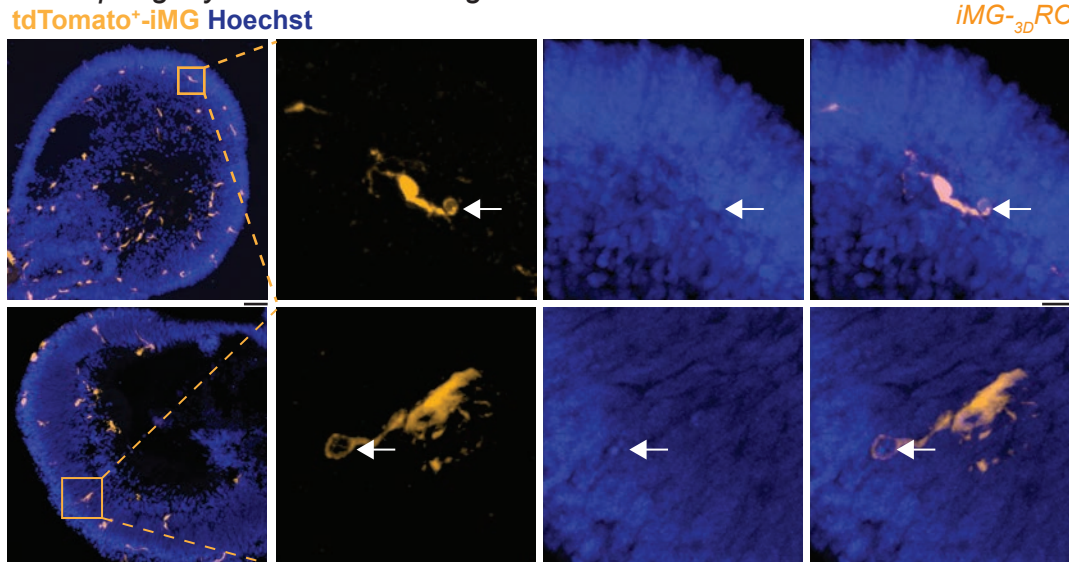

**Supplementary Figure 5 – iMG mediated consequences in the dissociated retinal organoid model.**

**a-c**, Boxplot of percent of **a**, CCAS3<sup>+</sup>-cells per area; **b**, Hoechst<sup>+</sup>-cells per area and **c**, TX2<sup>+</sup>-photoreceptor- and bipolar cells relative to Hoechst<sup>+</sup>-cells in <sub>diss</sub>RO (grey) and iMG-<sub>diss</sub>RO (orange). **a-b**, Students's t-test. **c**, Welch's t-test.

**d**, Representative images of iMG-<sub>diss</sub>RO for tdTomato expression (orange), counterstained for the nuclei-dye Hoechst (blue) and immunostained for the apoptotic marker CCAS3 (cleaved caspase3, green). White arrowhead: iMG engulfing CCAS3<sup>+</sup>-fragment. Scale bar: 50µm.

**e**, Hoechst<sup>+</sup>-fragments (white) in <sub>diss</sub>RO (left) and iMG-<sub>diss</sub>RO (right). Scale bar: 50 µm.

**f**, Boxplot of percent of Hoechst<sup>+</sup>-fragments per area in <sub>diss</sub>RO (grey) and iMG-<sub>diss</sub>RO (orange). Welch's t-test.

**g**, Representative images of iMG-<sub>3D</sub>RO cryostat sections counterstained with the nuclei-dye Hoechst (blue) and tdTomato<sup>+</sup>-iMG (orange) at WK20. Arrow: iMG engulfing Hoechst<sup>+</sup>-fragment. Scale bar: 50µm. Zoom in: Scale bar: 10µm.

Symbols: single ROI of three biological replicates from five independent differentiations.

For detailed statistical analysis, see **Supplementary Table 4**.

\*\*\* $p < 0.001$ . <sup>ns</sup> $p > 0.05$ , not significant.

**a** *Individual replicates*

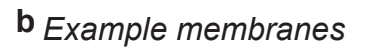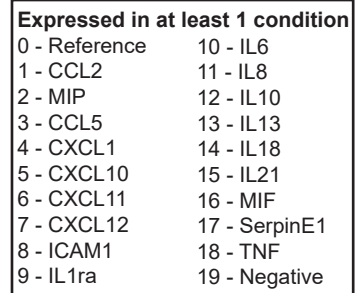

**d** *Not detected*

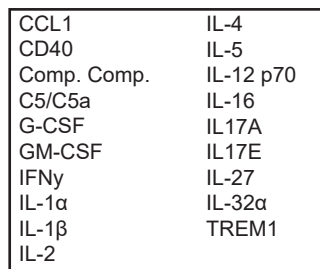

**Supplementary Figure 6 – Individual inflammatory proteome profiler results.**

- a**, Release of inflammatory cytokines and chemokines into the supernatant based on the experimental paradigm described in **Figure 3a** for control (CTRL, grey) and 24h- POLY(I:C) (magenta) stimulation. Individual heatmap plots with color-coded mean pixel intensity relative to the reference of three independent differentiations White: n.d. (not detectable). Side-bar: condition with iMG (orange) *versus* without (white) or CTRL *versus* POLY(I:C).
- b**, Representative membranes for each condition. Numbers refer to the legend below.
- c**, Example images of  $\text{dissRO}$  counterstained with the nuclei-dye Hoechst (blue) and immunostained for the glial marker GFAP (glial fibrillary acidic protein, green). Scale bar: 20  $\mu\text{m}$ .
- d**, List of proteins assayed on the membrane but not detected in the supernatant of any condition.



Supplementary Figure 7

a Timeline of cytokine release iMG-<sup>diss</sup>RO

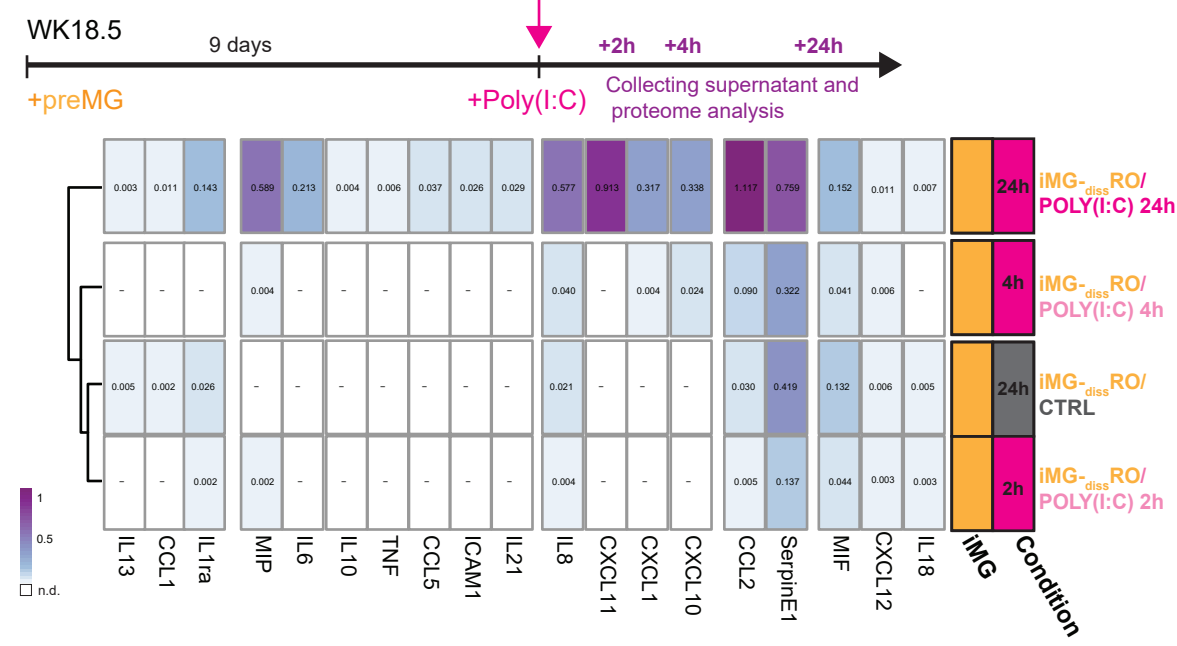

Example membrane

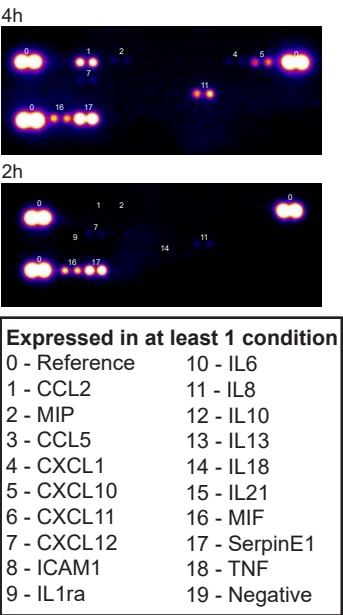

b Timeline iMG morphology in iMG-<sup>diss</sup>RO

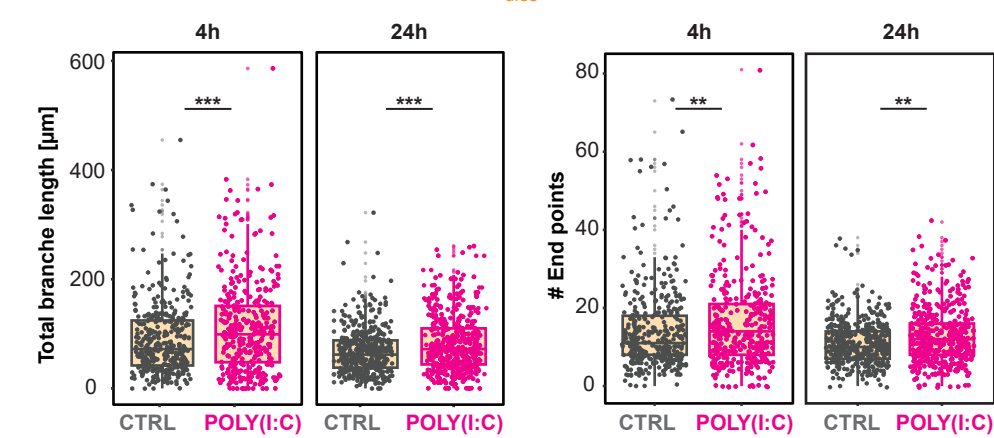

**Supplementary Figure 7 – Timeline POLY(I:C)-mediated response.**

**a**, Same assay as for in Supplementary Figure 6a with additional measurement of cytokine and chemokine release after two and four hours compared to 24h in iMG<sub>-diss</sub>RO with annotated example membranes iMG<sub>-diss</sub>RO.

**b**, Boxplot of the total branch length (left) and the number of endpoints (right) per iMG for CTRL (grey) and POLY(I:C) (magenta) following 4h and 24h stimulation in iMG<sub>-diss</sub>RO. iMG were collected from five independent differentiations. Kruskal-Wallis test with post-hoc Dunn's test.

## Supplementary Figure 8

### a Experimental design of CCL2 stimulation in $iMG_{-diss}RO$

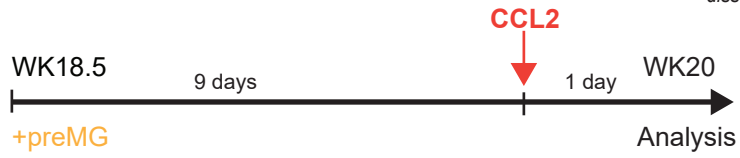

### b Retinal cell proliferation

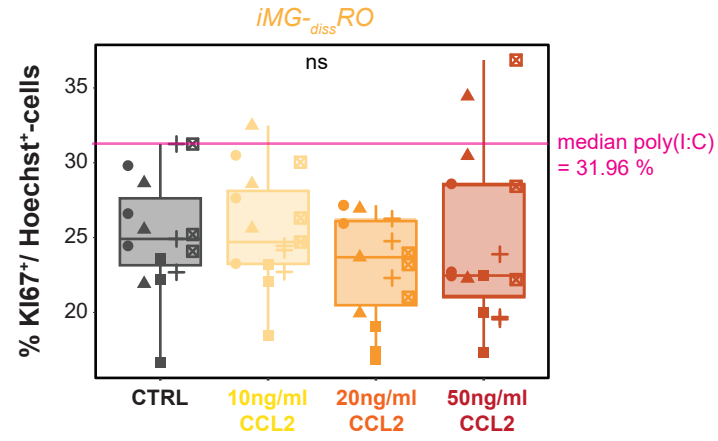

### c iMG proliferation

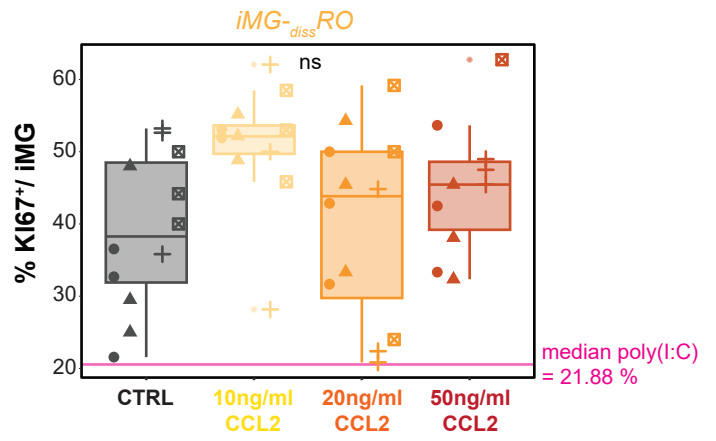

**Supplementary Figure 8 – The POLY(I:C)-mediated proliferation rate increase cannot be replicated with CCL2 alone.**

**a**, Experimental timeline. At WK18.5, preMG are added to  $\text{dissRO}$ . After nine days, cultures received fresh medium for control (CTRL, grey) or CCL2 stimulation iMG- $\text{dissRO}$  for 24 hours.

**b**, Effect of CCL2 on retinal cell proliferation excluding iMG. Boxplot of percent KI67<sup>+</sup>-cells relative to Hoechst<sup>+</sup>-cells in iMG- $\text{dissRO}$  for CTRL and CCL2 stimulation at a final concentration of 10 ng/mL (yellow), 20 ng/mL (orange), and 50 ng/mL (red). Magenta line: Median proliferation rate in POLY(I:C) stimulation of iMG- $\text{dissRO}$  (**Figure 4g**). Symbols: three biological replicates from five independent differentiations. One-way ANOVA.

**c**, Effect of CCL2 on iMG proliferation. Boxplot of percent KI67<sup>+</sup>/iMG for CTRL and CCL2 stimulation at a final concentration of 10 ng/mL (yellow), 20 ng/mL (orange), and 50 ng/mL (red). Magenta line: Median iMG-proliferation rate in POLY(I:C) stimulation of iMG- $\text{dissRO}$  (**Figure 4d**). Symbols: three biological replicates from five independent differentiations. Kruskal-Wallis test.

For detailed statistical analysis, see **Supplementary Table 4**.

\* $p < 0.05$ . <sup>ns</sup> $p > 0.05$ , not significant.



# Supplementary Figure 9

a Release of inflammatory mediators following ibuprofen treatment in *iMG<sup>-diss</sup>RO*

Pixel intensity normalized to reference

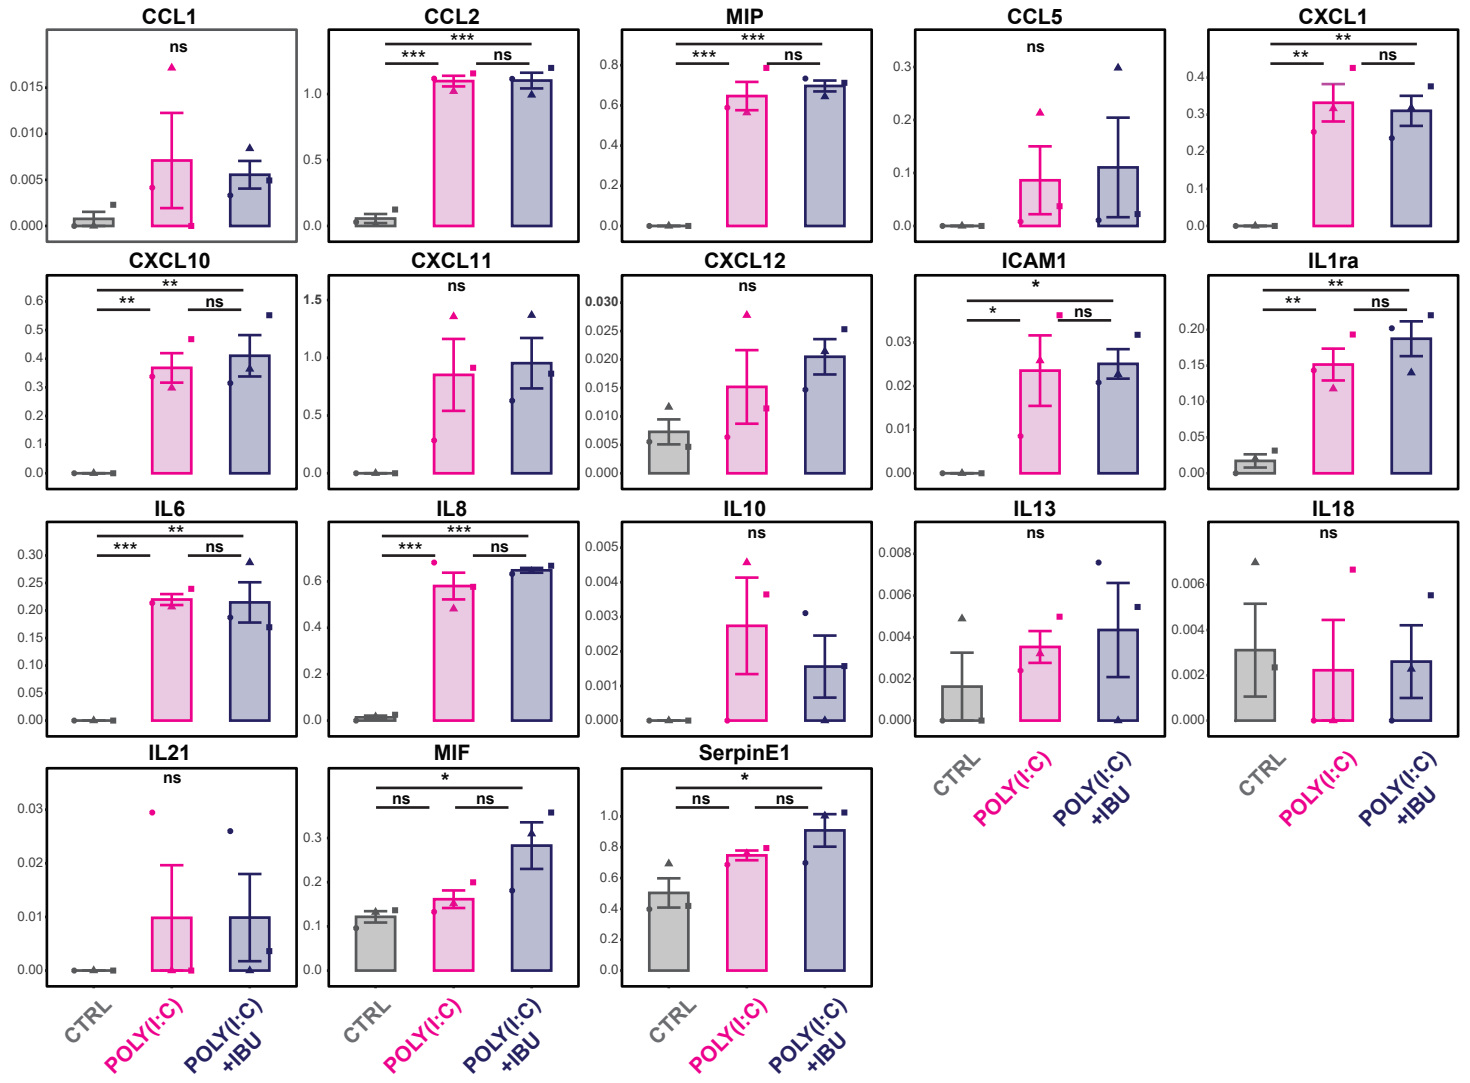

**Supplementary Figure 9 –Comparison of individual secreted inflammatory mediators after ibuprofen exposure.**

**a**, Release of inflammatory cytokines and chemokines into the supernatant based on the experimental paradigm described in **Figure 3a** for control (CTRL, grey), POLY(I:C) (magenta), and POLY(I:C) and S(+)-ibuprofen (POLY(I:C)+IBU, blue) stimulation. Release of different inflammatory mediators into the supernatant of iMG-dissRO. Bar chart of pixel intensity normalized to reference with standard error of the mean for CTRL, POLY(I:C), and POLY(I:C)+IBU. Each symbol: an independent differentiation (n=3). One-way ANOVA with post-hoc Tukey's test, except IL13, IL18, IL21 Kruskal-Wallis test.

For detailed statistical analysis, see **Supplementary Table 4**.

\*\*\*p < 0.001. \*\*p < 0.01. \*p < 0.05. <sup>ns</sup>p > 0.05, not significant.

# Supplementary Figure 10

Retinal cell types transduced with AAV2 7m/8

f Calcium dynamics

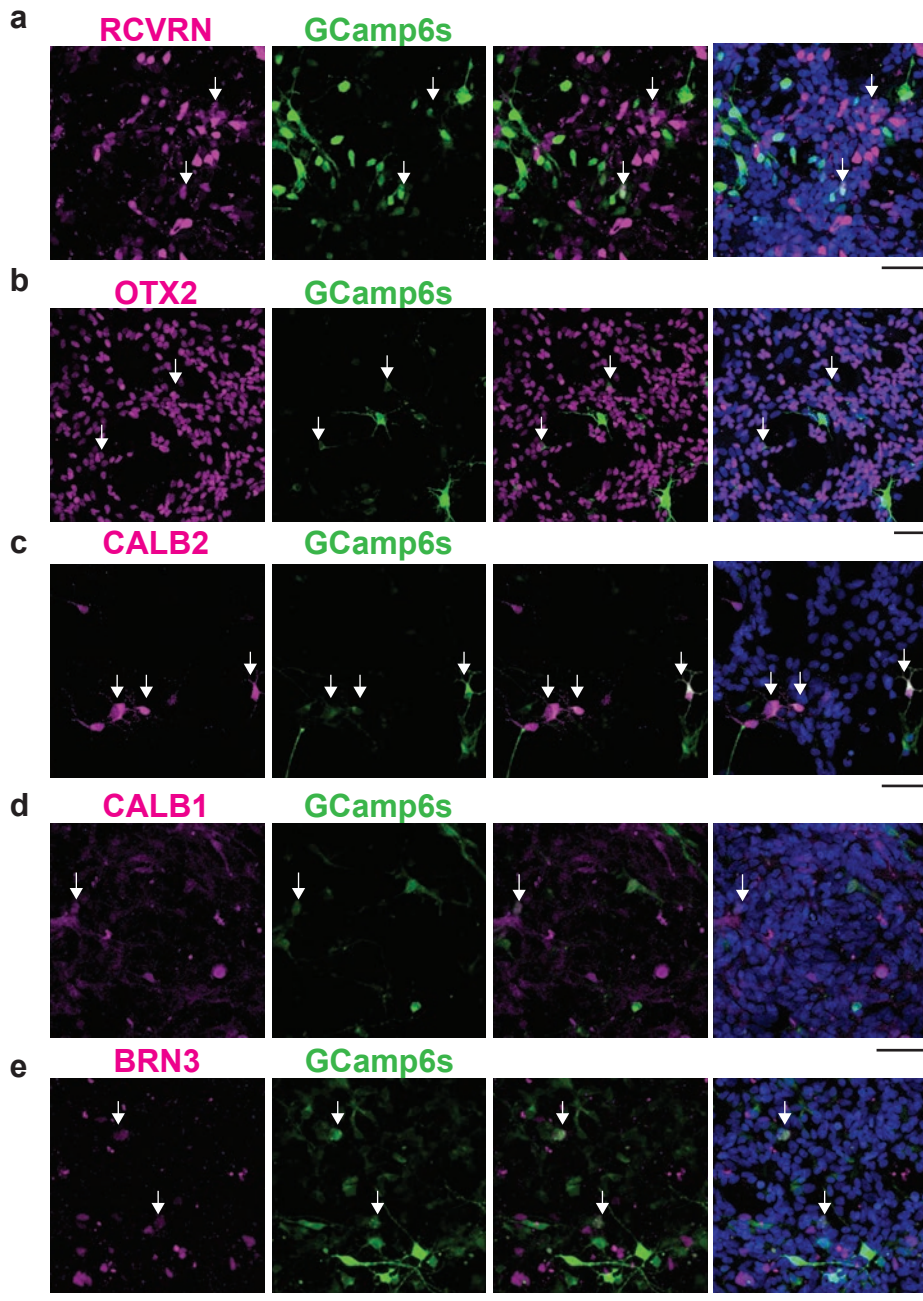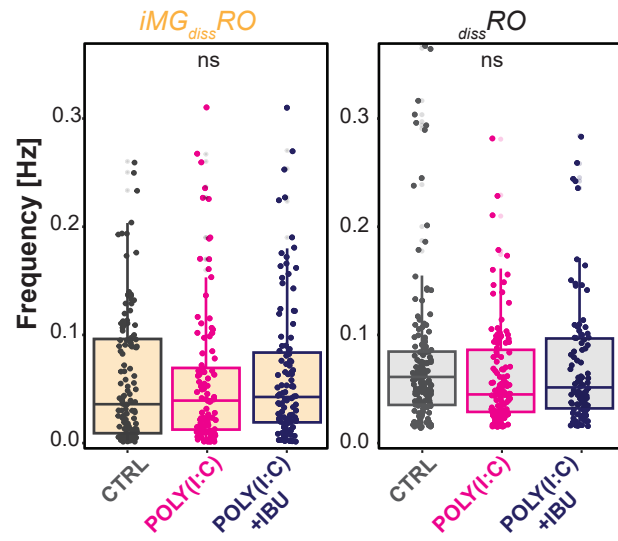

**Supplementary Figure 10 –GCAMP6s expression across retinal cell types.**

**a-e**, Example ROI images of  $\text{dissRO}$  infected with AAV2-GCAMP6s at WK17, analyzed at WK20, counterstained for the nuclei-dye Hoechst (blue) and the calcium sensor GCAMP6s (green), and immunostaining for retinal cell types (magenta): **a**, RCVRN (recoverin; photoreceptors). **b**, OTX2 (orthodenticle homeobox 2; photoreceptors, bipolar cells). **c**, CALB2 (calretinin; photoreceptors, bipolar-, amacrine cells). **d**, CALB1 (calbindin; amacrine-, horizontal cells). **e**, BRN3 (brain-specific homeobox/POU domain protein 3B; ganglion cells). Arrow: Co-expression of calcium sensor and retinal marker. Scale bar: 50 $\mu\text{m}$ .

**f**, Spontaneous calcium dynamics in iMG- $\text{dissRO}$  (orange) and  $\text{dissRO}$  (grey) for control (CTRL, grey), POLY(I:C) (magenta), and POLY(I:C) and S(+)-ibuprofen (POLY(I:C)+IBU, blue) stimulation. Boxplot of the mean frequency [Hz] during five minutes of recording. Each dot represents an active cell. Recordings from five biological replicates from independent differentiations. Kruskal-Wallis test.

For detailed statistical analysis, see **Supplementary Table 4**.

<sup>ns</sup> $p > 0.05$ , not significant.



Supplementary Figure 11

a Expression in UCSC Cell Browser of Cowan et al., 2020

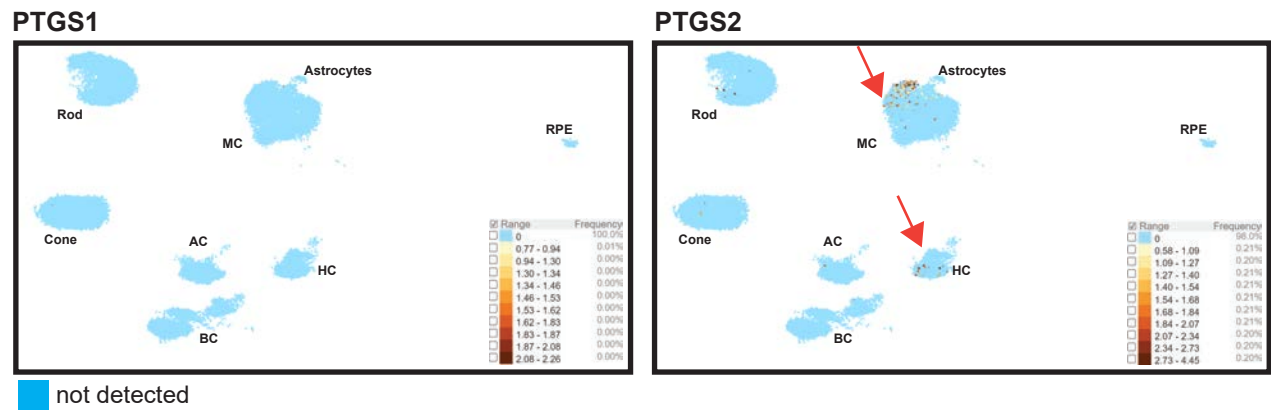

b Expression of TLR3 in UCSC Cell Browser of Cowan et al., 2020

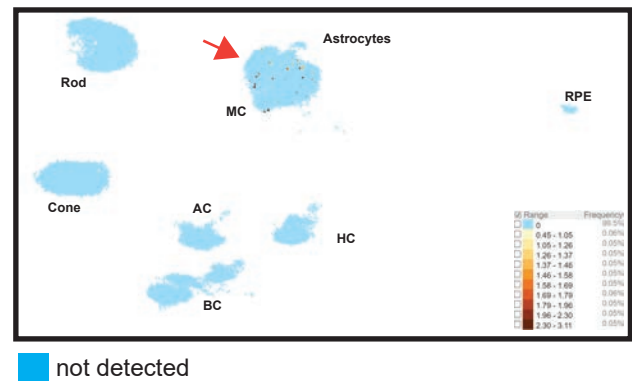

c hIPSC-derived astrocytes

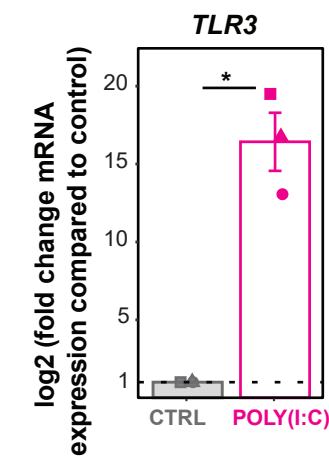

**Supplementary Figure 11 – PTGS1, PTGS2, and TLR3 mRNA expression profile.**

**a-b**, Expression of **(a)** PTGS1 and PTGS2 (prostaglandin-endoperoxide synthase 1 and 2) as well as **(b)** TLR3 (toll-like receptor 3) in USCS Cell Browser of *Cowan et al., 2020*. Cell Browser dataset ID: 'Developed human retinal organoid.' Uniform manifold approximation and projection (UMAP) of transcript expression. AC: amacrine cell. BC: bipolar cell. Cone: cone photoreceptors. HC: horizontal cell. MC: Müller glia. RPE: retinal pigment epithelium. Rod: rod photoreceptors. Red arrow: positive transcript expression. Blue dot: not detected.

**c**, Real-time quantitative polymerase chain reaction (RT-qPCR) for TLR3 (toll-like receptor 3) in hiPSC-derived astrocytes for untreated control (CTRL, grey) and POLY(I:C) (magenta) exposure. Mean mRNA transcript log2-fold changes compared to untreated control cells with standard error of the mean. Each symbol is an independent differentiation (n=3). One sample t-test.

For detailed statistical analysis, see **Supplementary Table 4**.

\*p < 0.05.
